# Supplementary material for: Cranial dural arteriovenous shunts: selection of the ideal lesion for surgical occlusion according to the classification system
Source: Springer Nature journal article supplement (doi:10.1007/s00701-019-03984-4), 2019-07-03
Supplement: MOESM6 [file 16878864]

**Legend supplementary figures**

Illustrations representing cDAVFs located at different levels of the cranial venous system (from inside to outside)

A. a Bridging Vein Shunt (BVS) with Direct and Exclusive leptomeningeal venous reflux (LVR) causing in this particular illustrated case, Strain to the cortical veins (DES).

B. a Dural Sinus Shunt (DSS) with LVR, which is non-Direct and non-Exclusive but in this particular illustrated case causes Strain to the cortical veins (nDnES), presumably due to partial thrombosis of the sinus.

C. an Isolated Sinus Shunt (ISS) with non-Direct, Exclusive and in this particular illustrated case, Strained LVR (nDES).

D. an Emissary Vein Shunt (EVS), which usually does not present LVR.

Figures 2, 3, 4 used by permission of Springer Nature, from G Baltsavias (2014).
